# Supplementary material
Source: Research Square preprint supplement (doi:10.21203/rs.3.rs-9570875/v1)
Supplement: Supplementary file 1 [file 730cabc75629c7ba13e8cce1.docx]

Electronic Supplementary Information

**Title: Low-temperature Quinoline Formation via Direct Nitrogen Incorporation in Astrochemical and Combustion Environments**

By He et al.

Corresponding authors: [xiemin@m.scnu.edu.cn](mailto:xiemin@m.scnu.edu.cn) (Min Xie); [zhdwang@ustc.edu.cn](mailto:zhdwang@ustc.edu.cn) (Zhandong Wang); [yjhu@scnu.edu.cn](mailto:yjhu@scnu.edu.cn) (Yongjun Hu); [jguan43@ustc.edu.cn](mailto:jguan43@ustc.edu.cn) (Jiwen Guan).

Contents

1. Supplementary Figures (Fig. S1 to Fig. S6) S-2
2. Supplementary Tables (Table S1 to Table S4) S-8
3. Coordinates and Frequencies S-15
5. Supplementary Figures (Fig. S1 to Fig. S4)


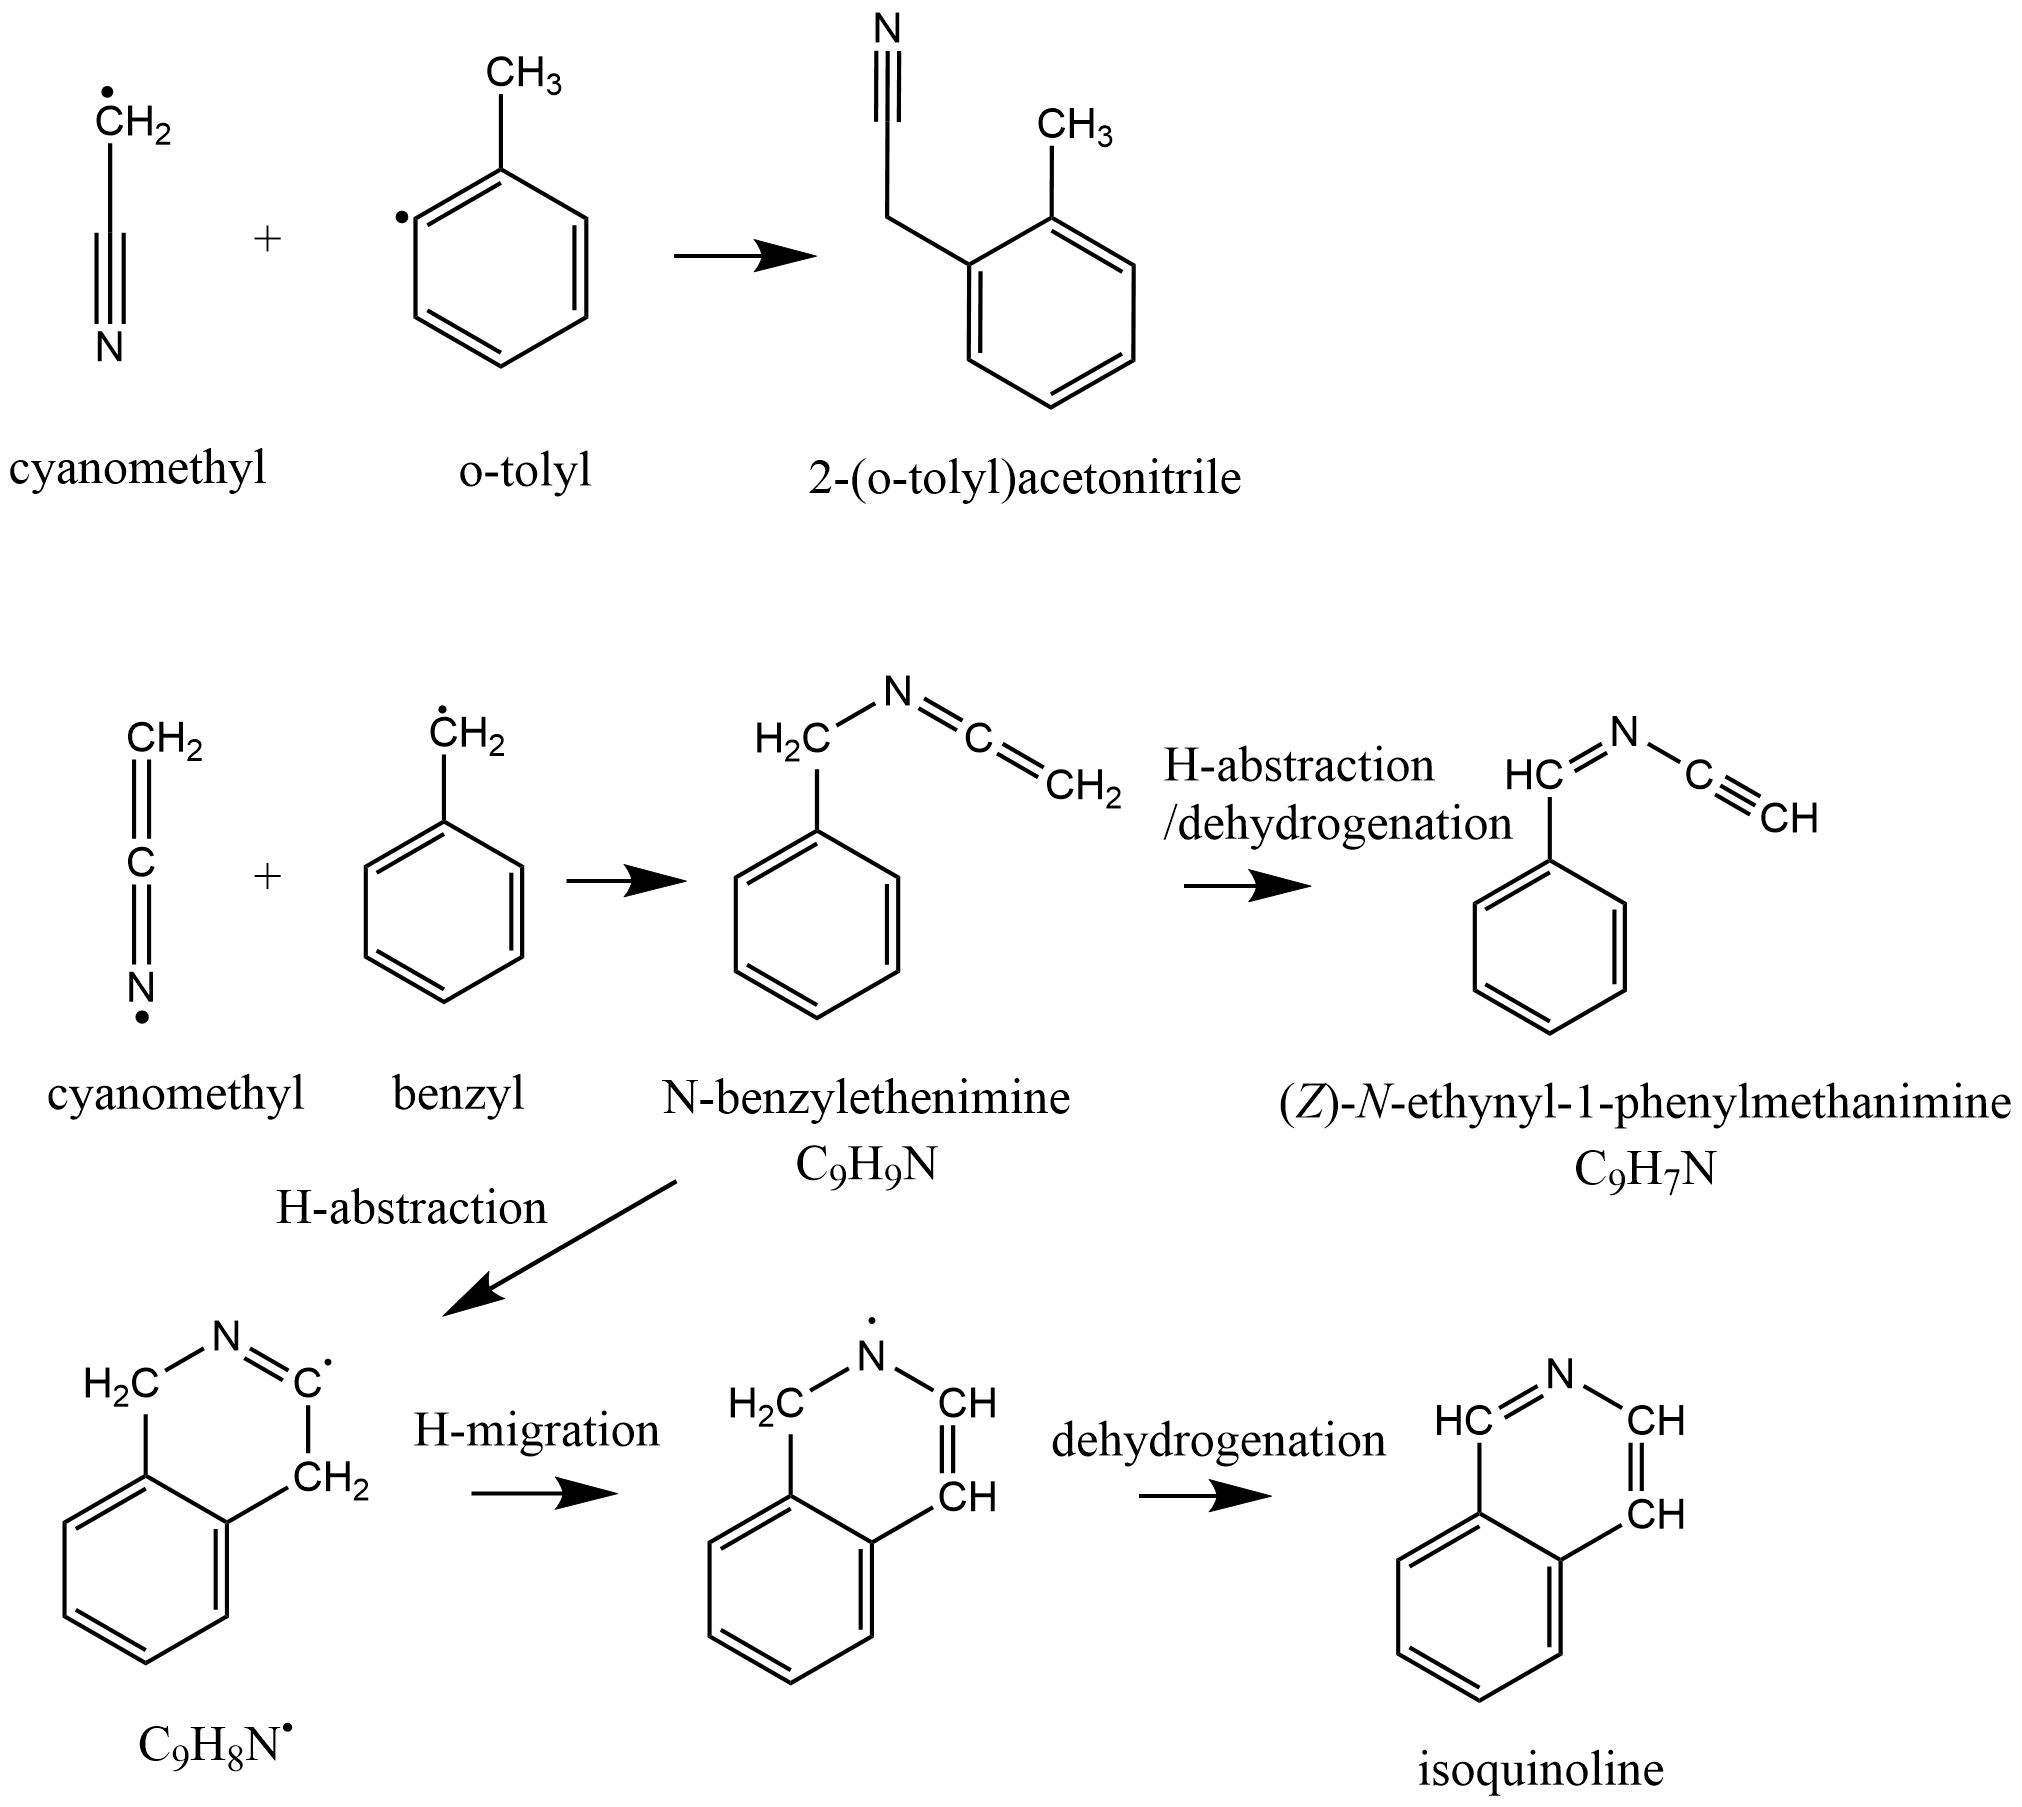


**Figure S1.** The predicted reaction pathways of cyanomethyl radical (less dominant electronic configuration) + benzyl radical.


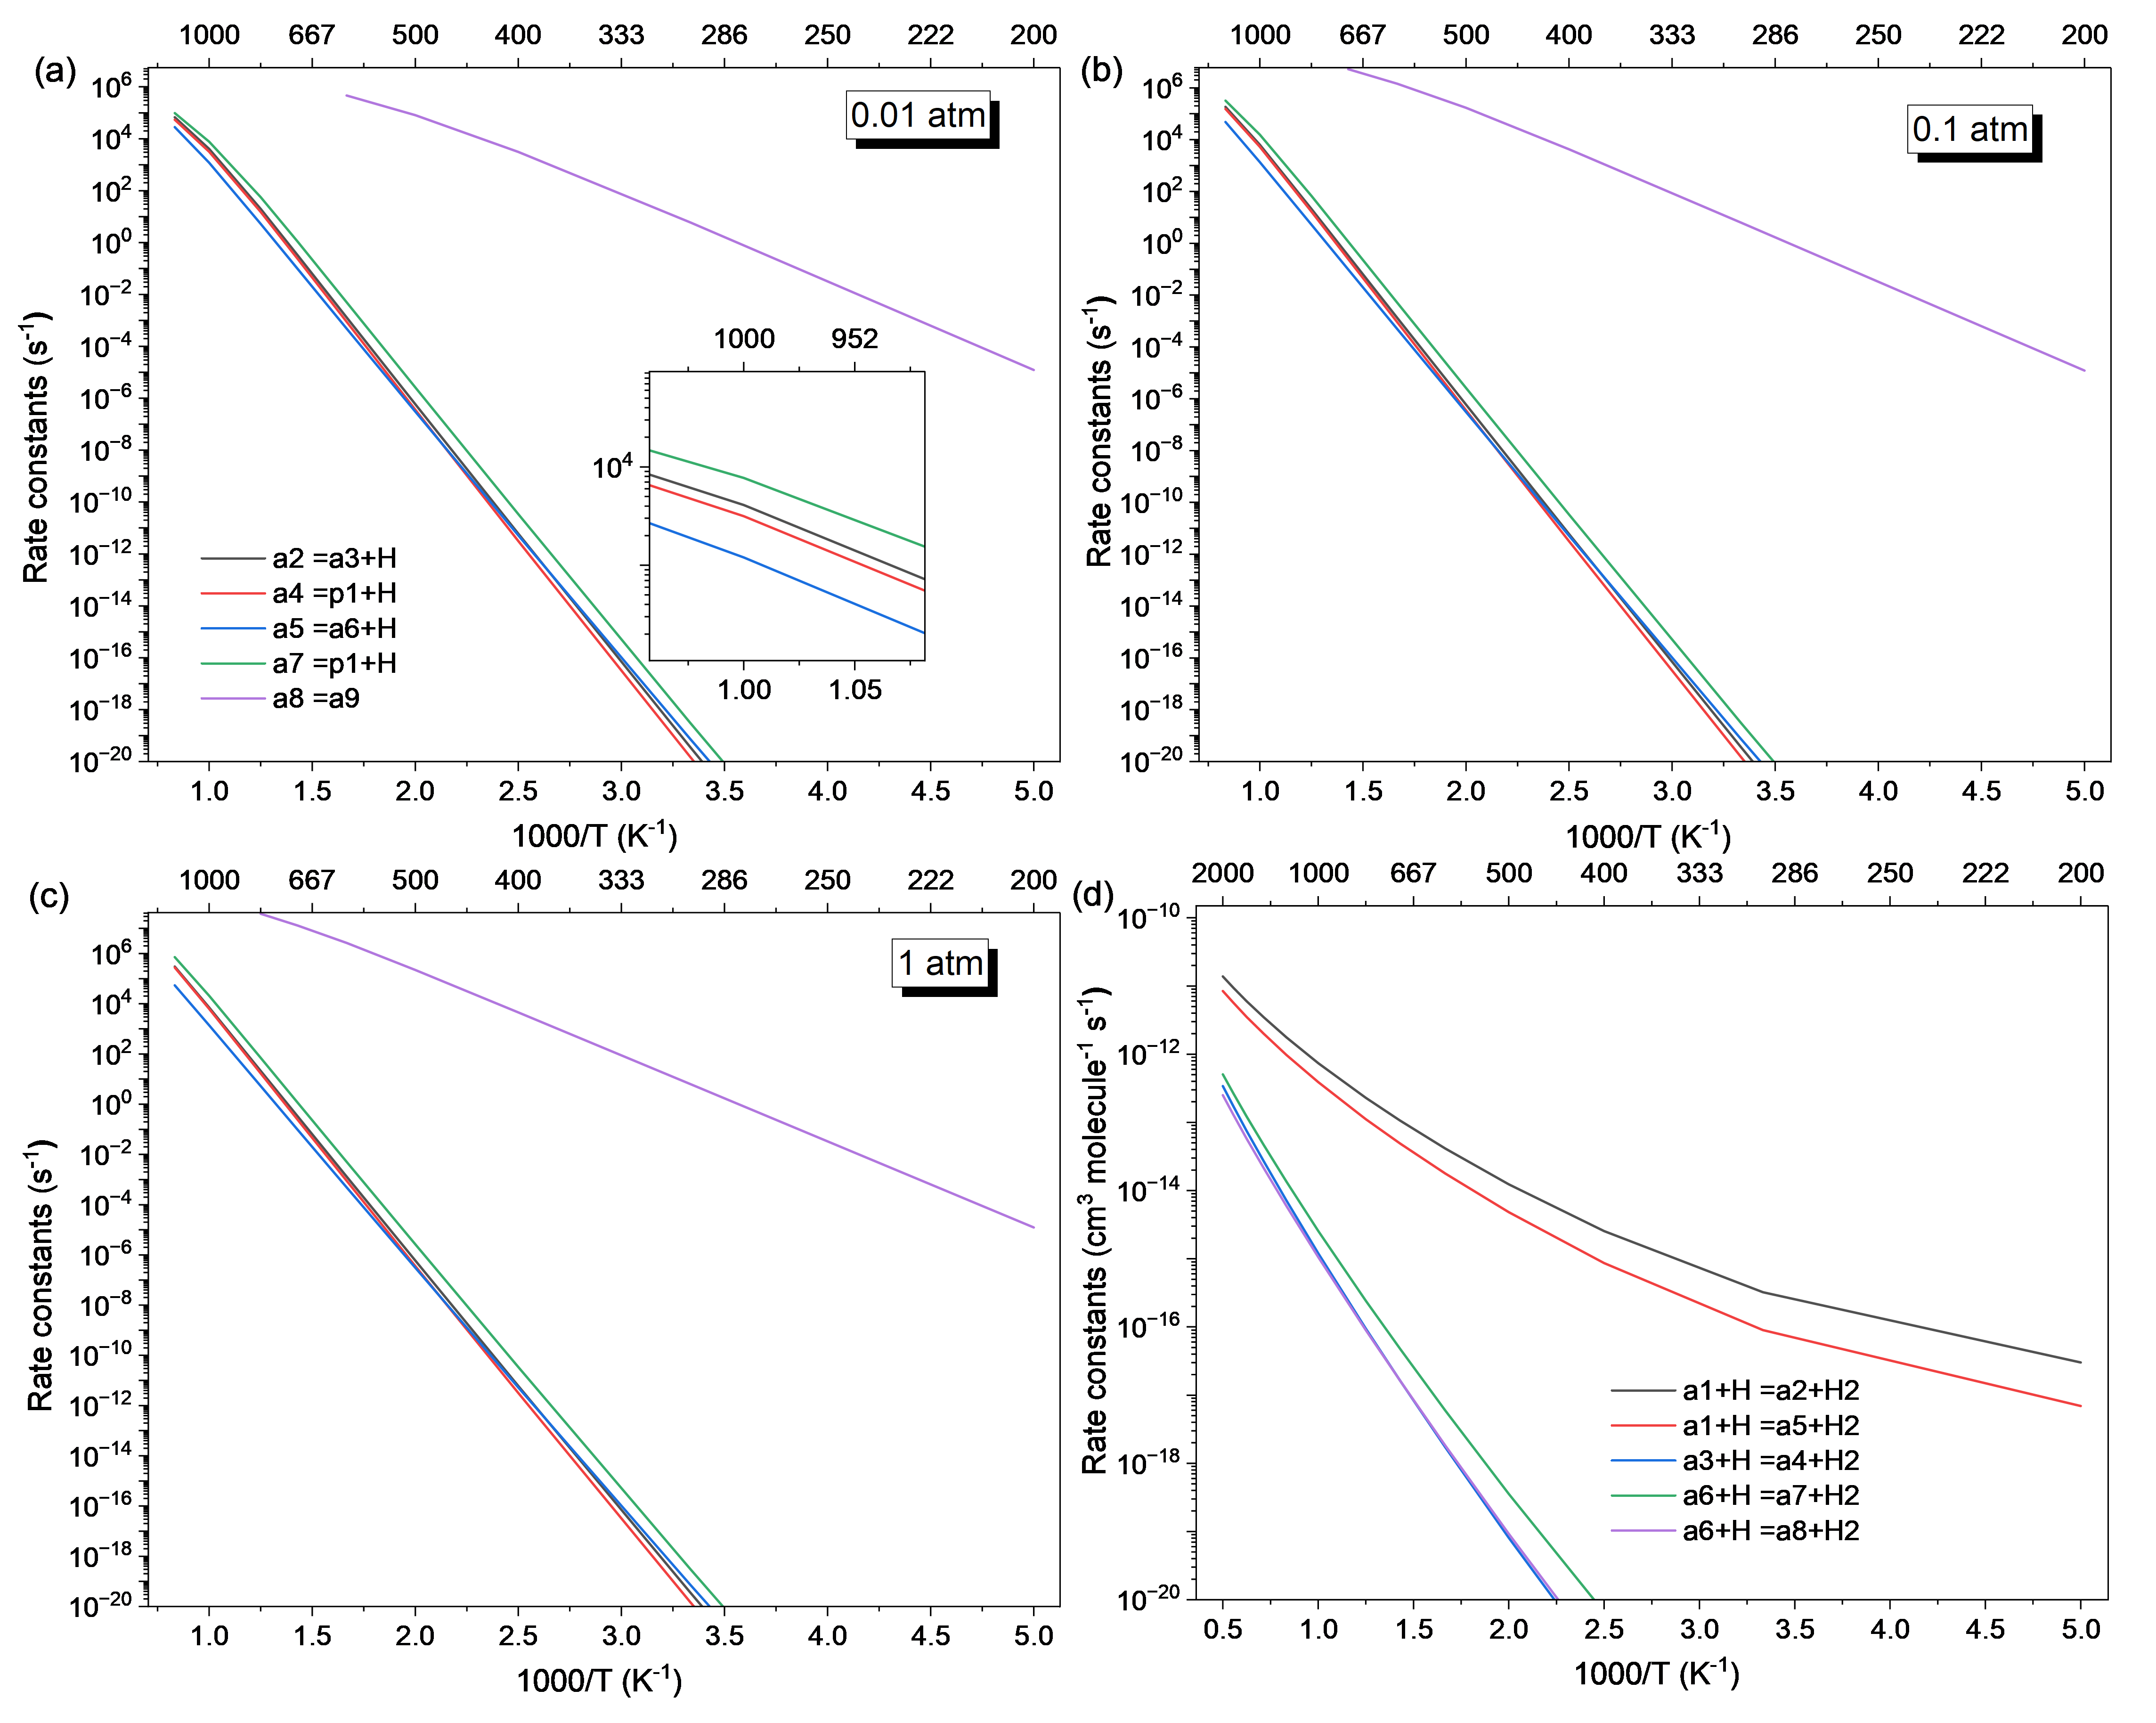


**Figure S2.** The calculated rate constants of the elementary reactions in the C2H2N + C7H7 reactions. (a)-(c) the isomerization and dehydrogenation reactions at the pressure of 0.01-1.0 atm, (d) H-abstraction reactions of a1, a3, a6 with the H atom as the abstractor.


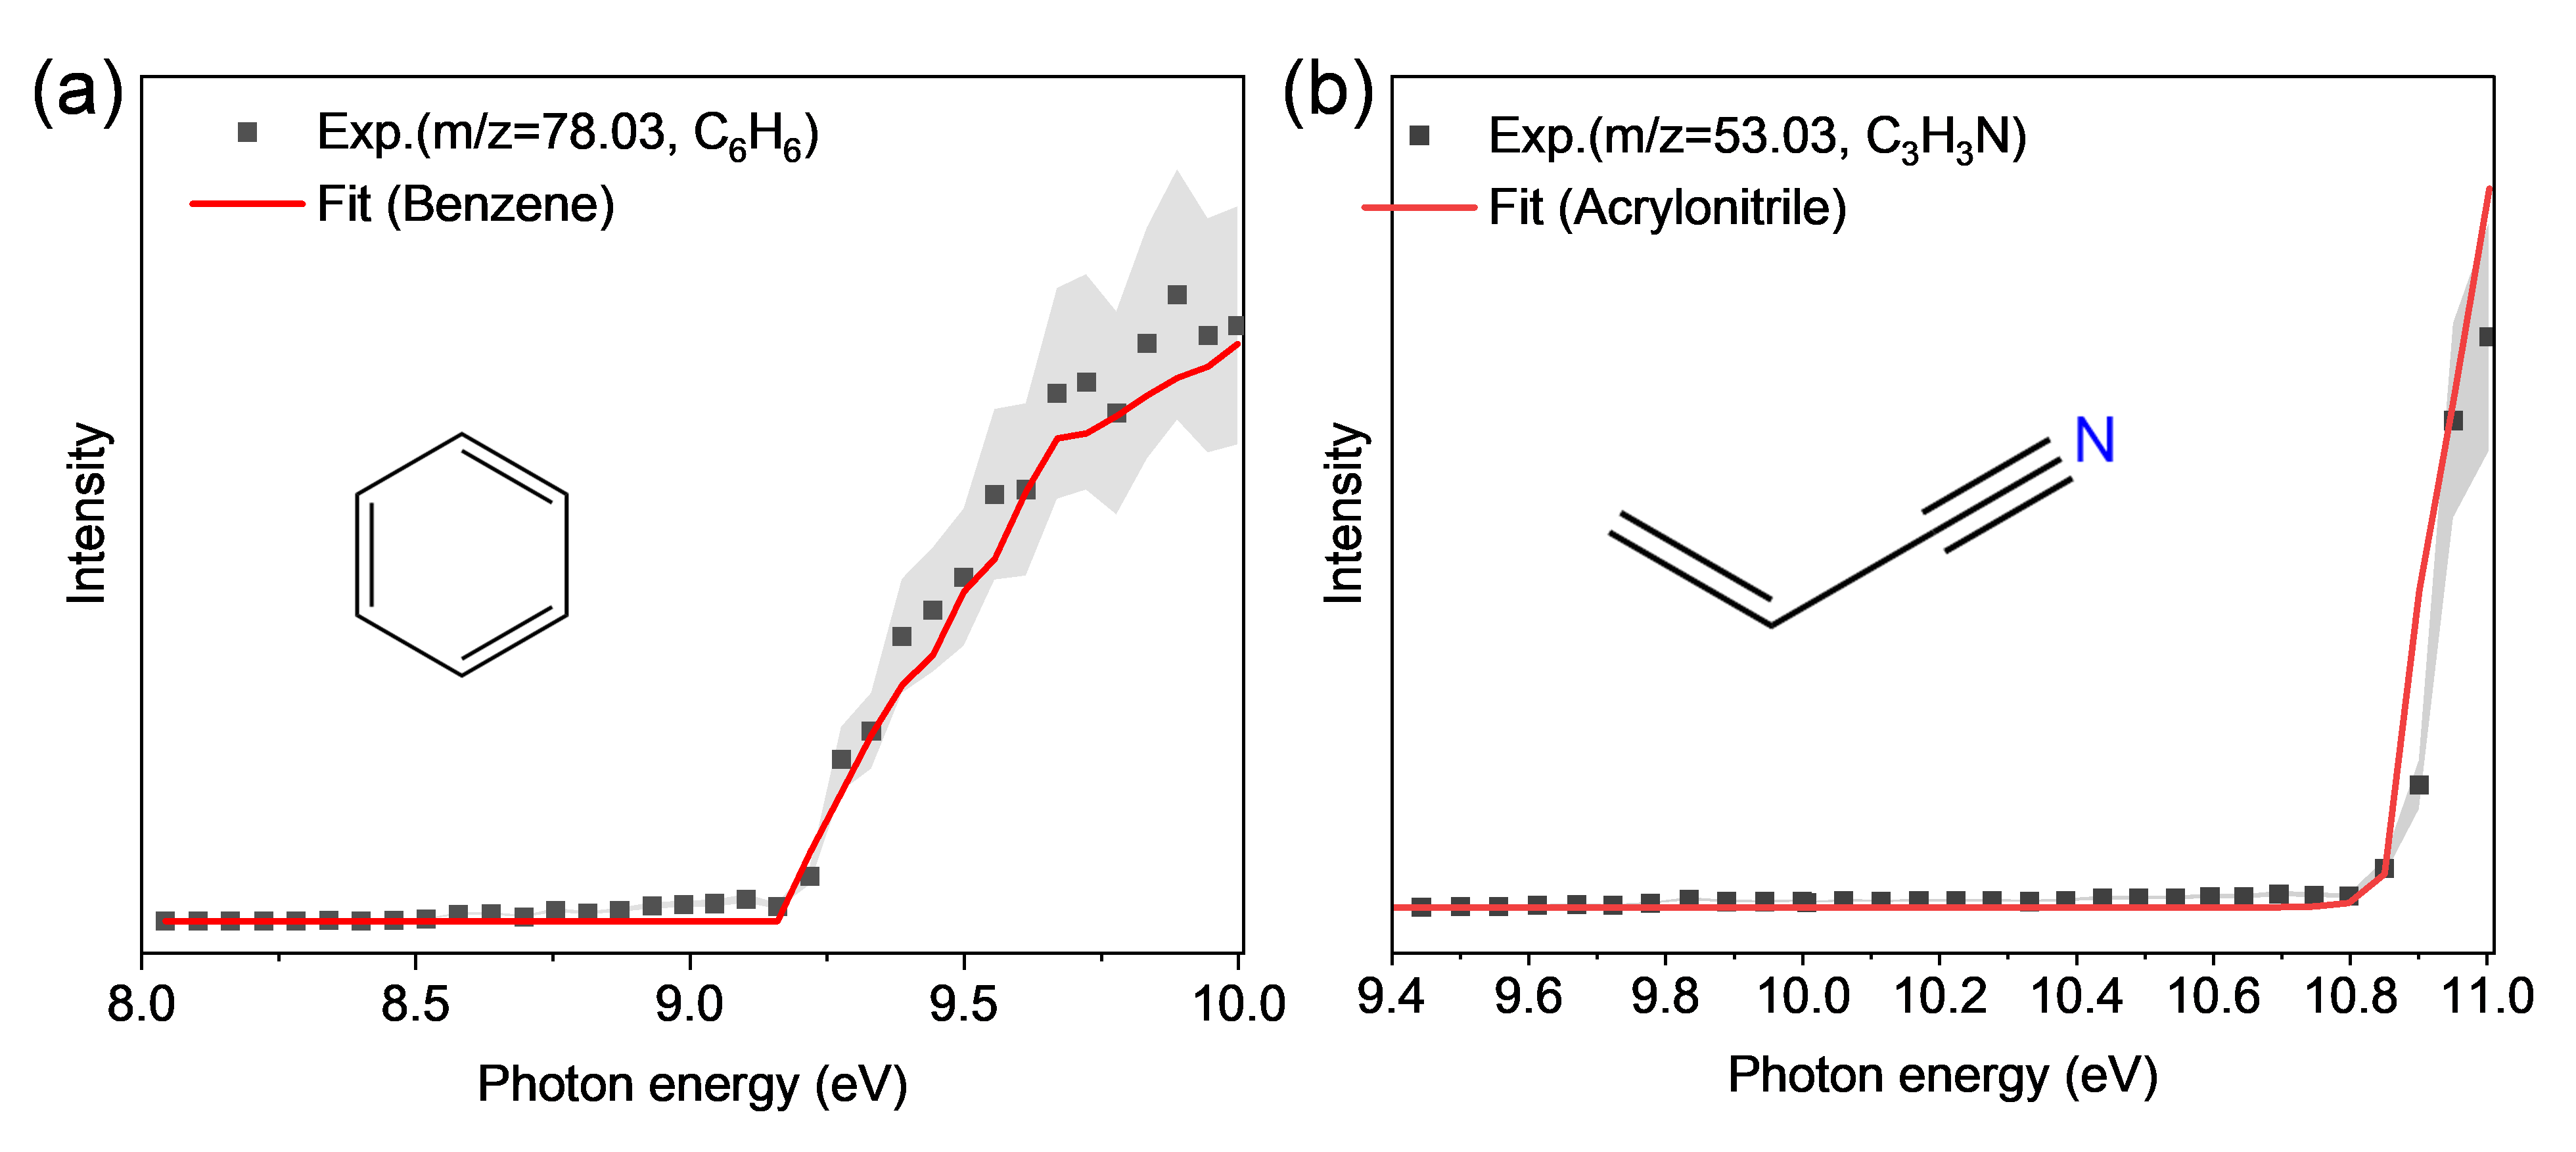


**Figure S3.** The PIE curves for the signal at m/z = 78.03 (a), 53.03 (b) in the co-pyrolysis of C2H2NBr and C7H7Br in a SiC microreactor at the temperature of 1650 K. Black and dotted curve: experimentally derived PIE curves; red line: reference PIE curve. The overall error shades are the estimated 15% of the signal intensity based on the accuracy of the photodiode. The reference PIE of acrylonitrile is measured by this work and the reference PIE of benzene is taken from the reference (Rennie, et al., Chem. Phys. 1998, 229, 107).

**
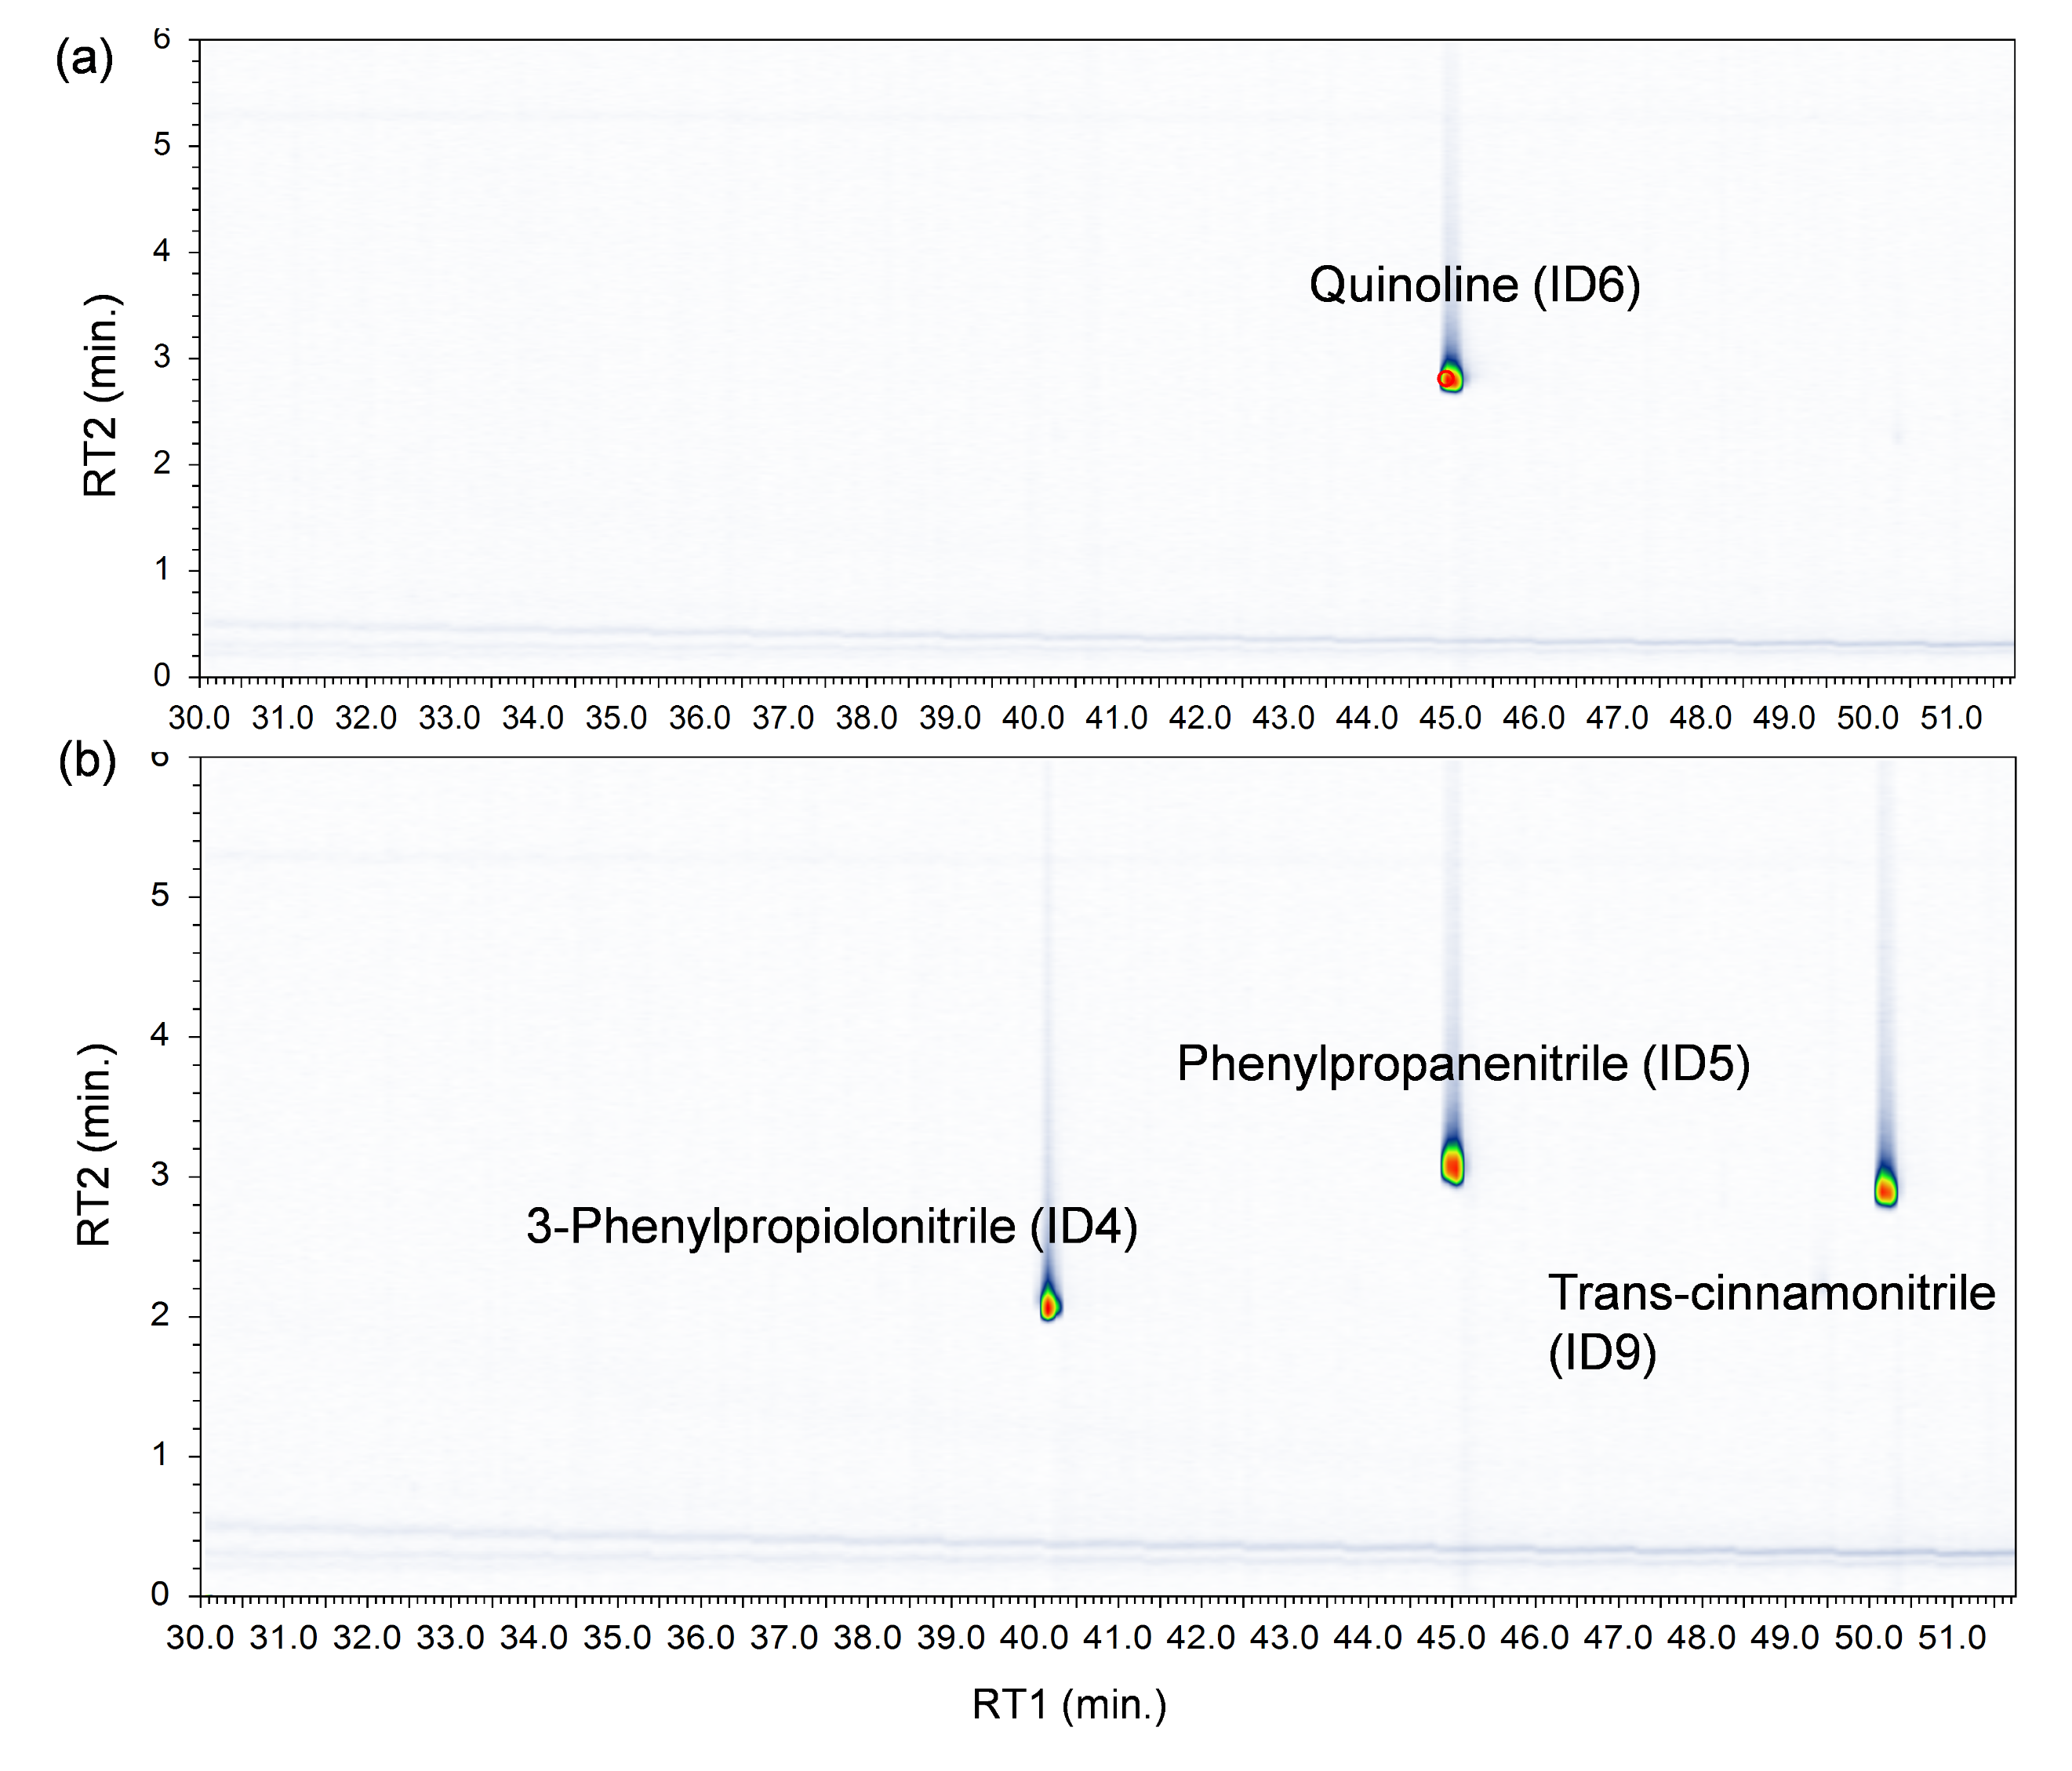
**

**Figure S4**. GC×GC spectra of the standard sample of quinoline (a), 3-phenylpropiolonitrile, phenylpropanenitrile, and trans-cinnamonitrile (b).

**
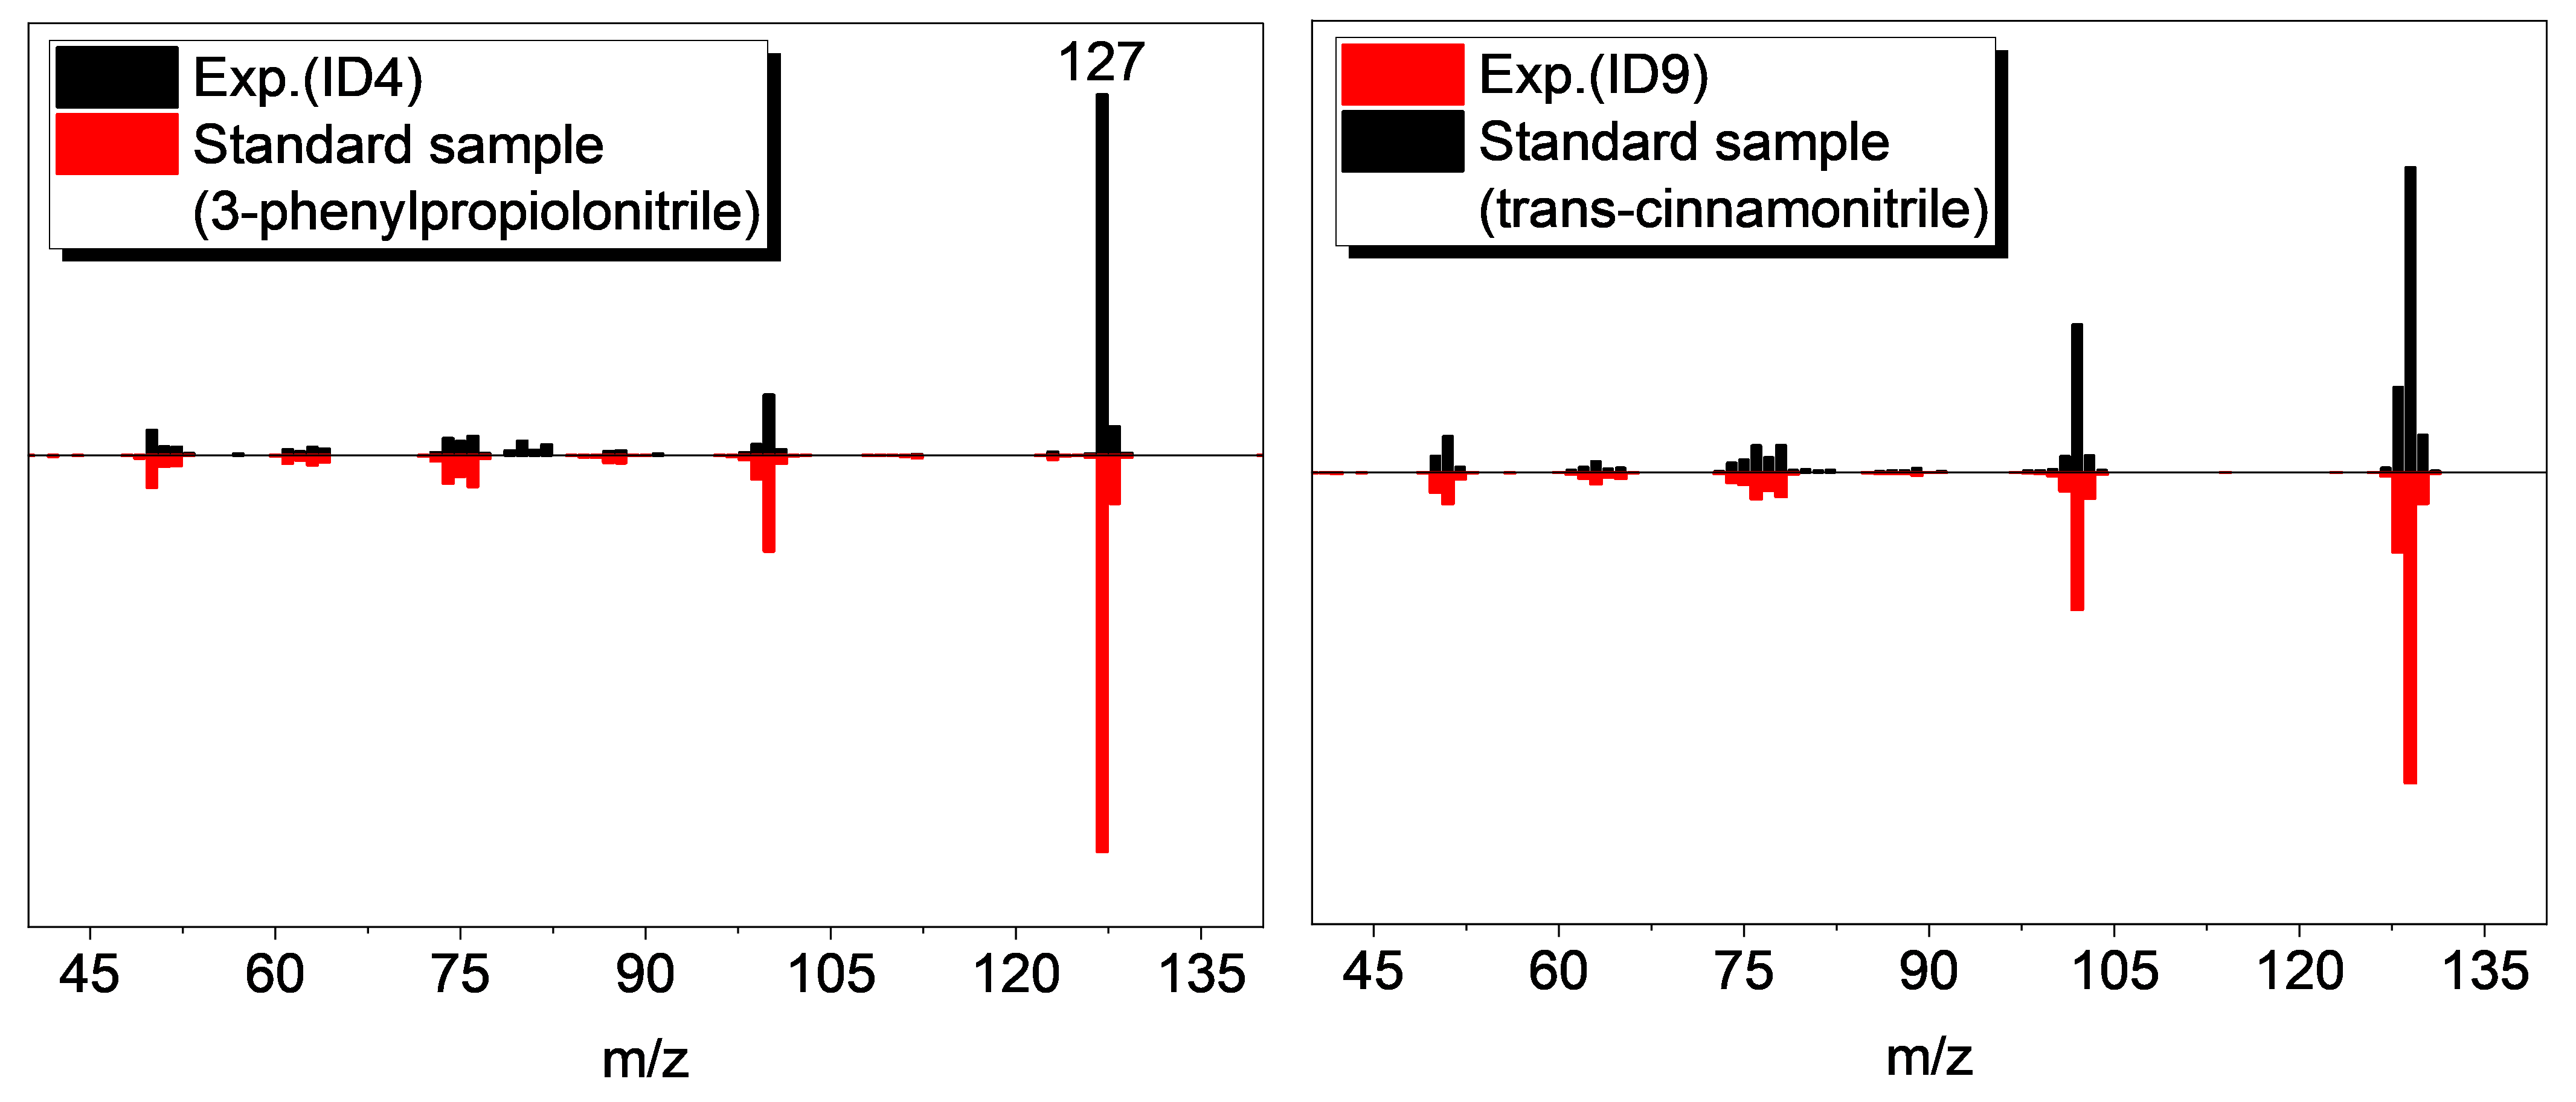
**

**Figure S5**. The experimental electron ionization (EI) mass spectra of the measured GC×GC peaks of the enriched products of the 1.1% C7H7Br and 6.9% C2H2NBr co-pyrolysis at 1650 K. (a) ID4, (b) ID9 of the species in Figure 5a of the main text. The reference EI mass spectra of the standard samples collected in this work are compared.


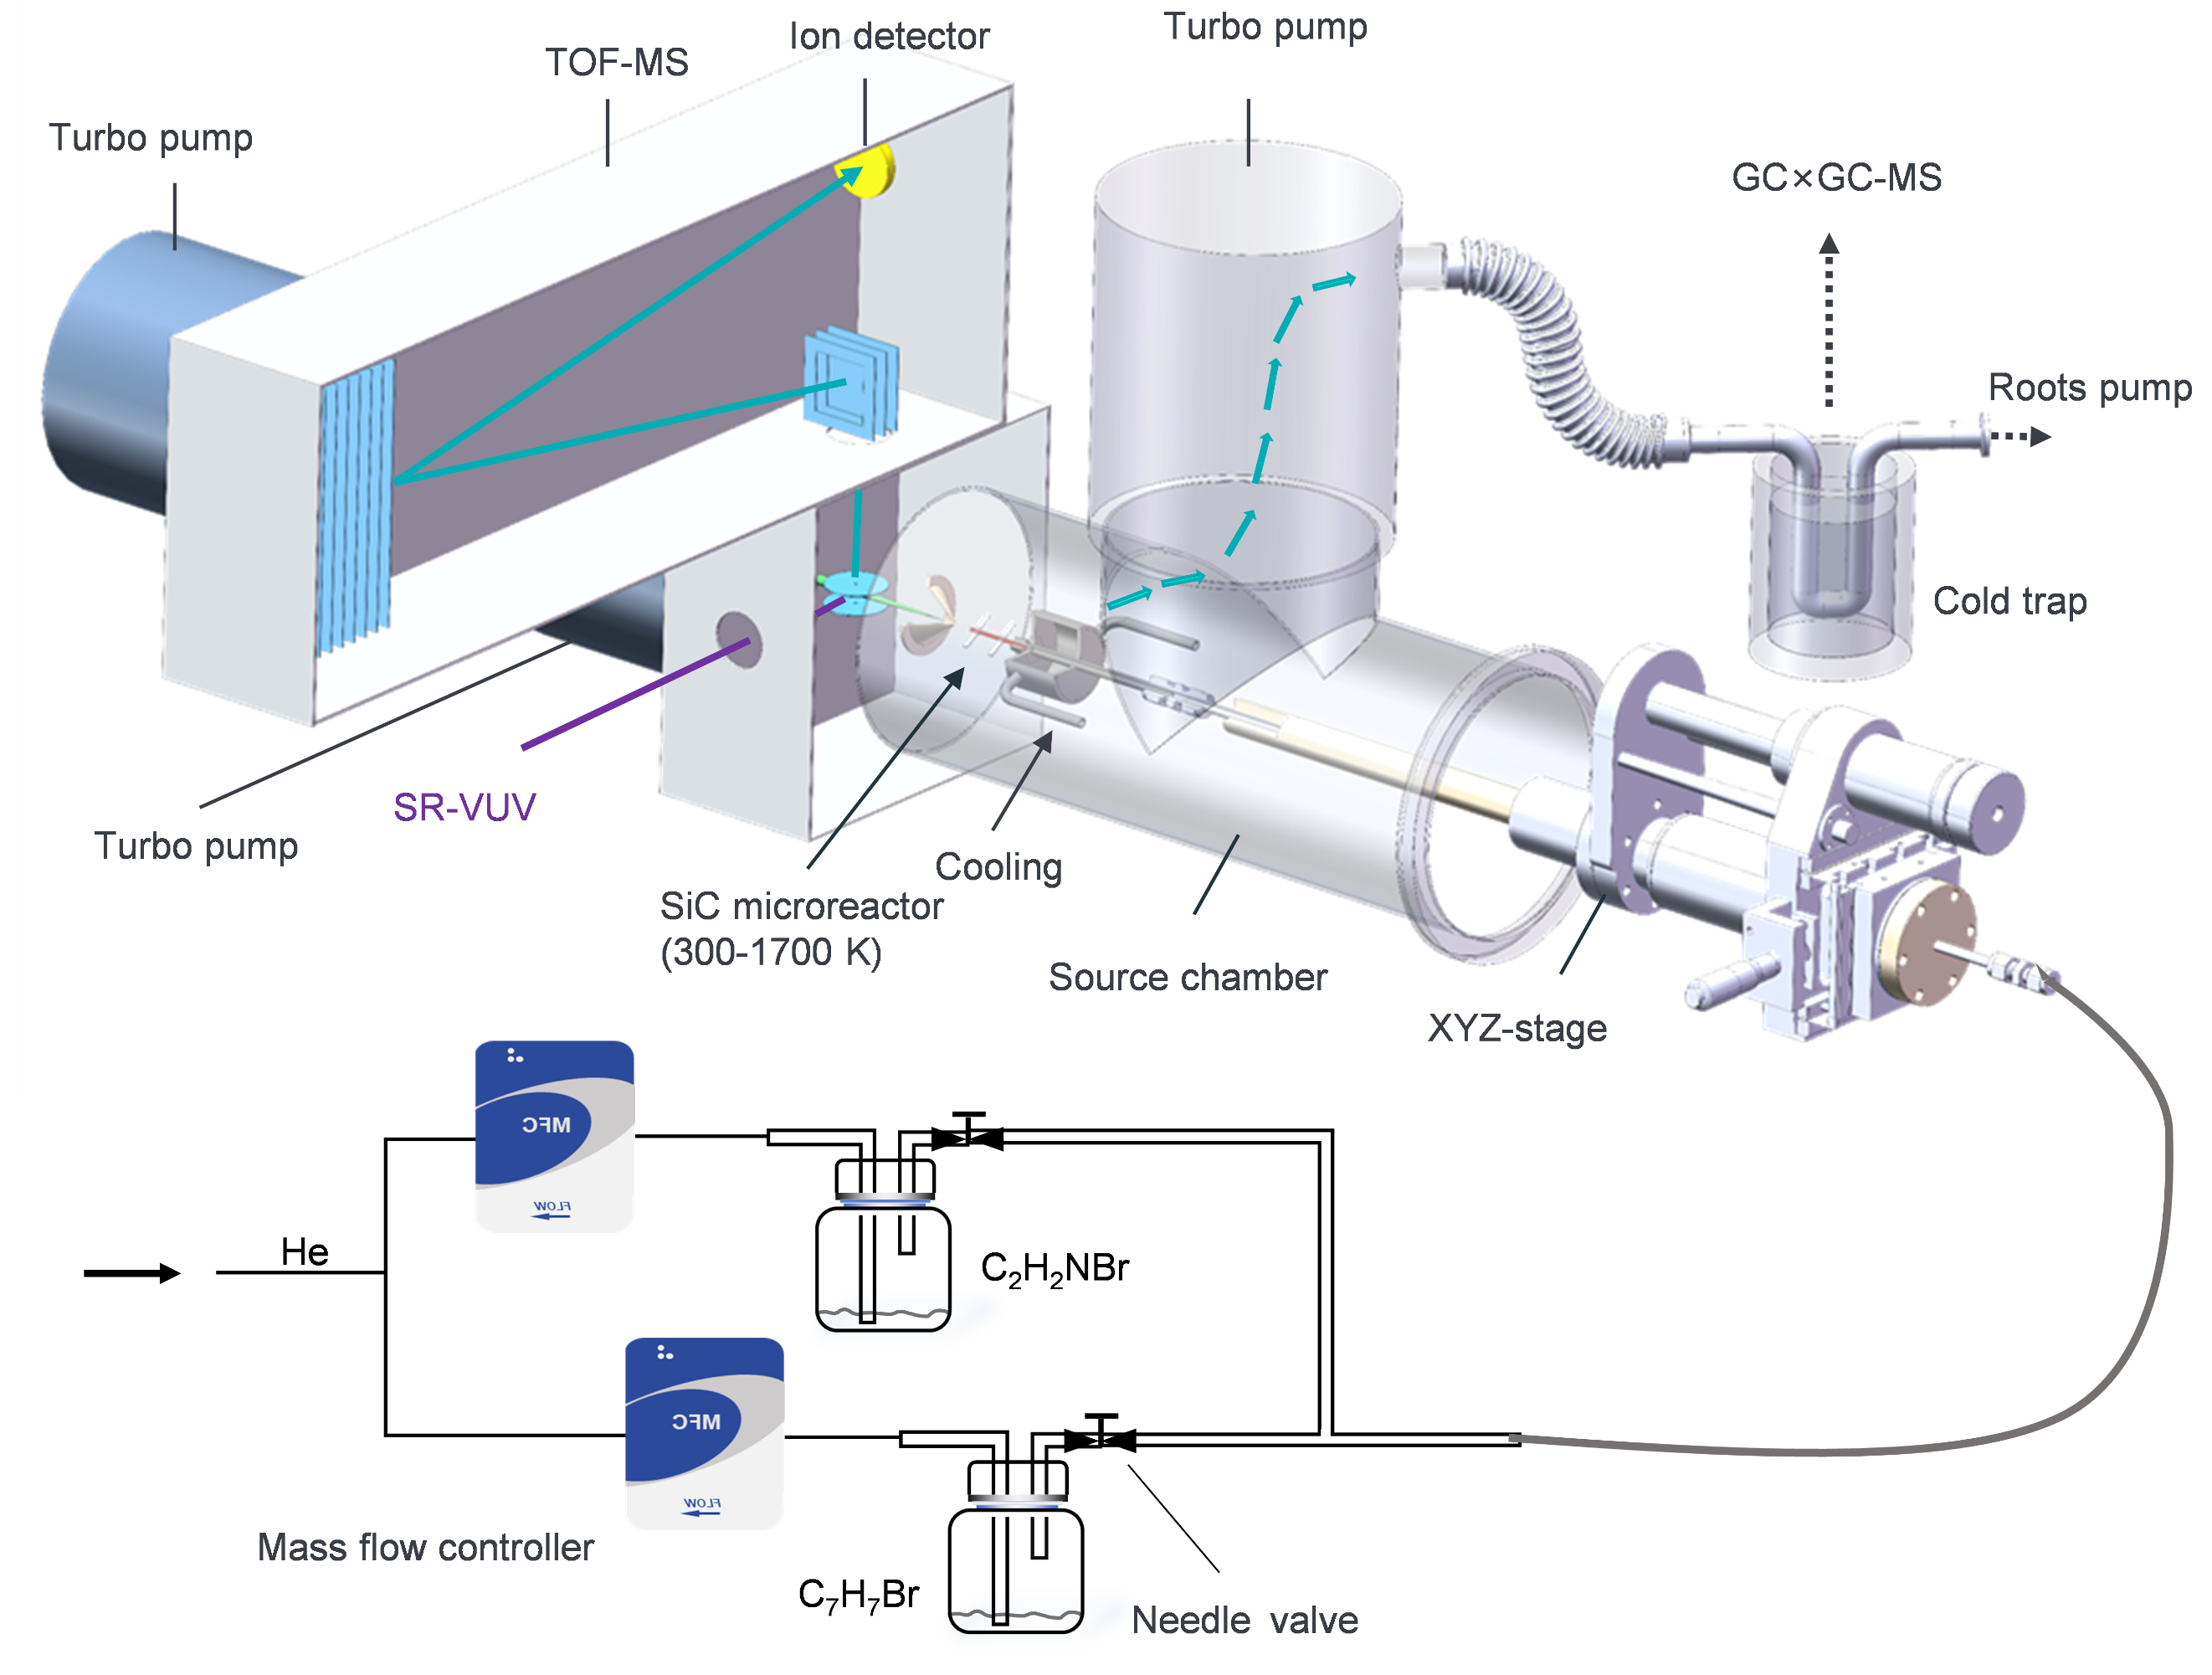


**Figure S6.** The SiC microreactor coupled to SVUV-PIMS used for the co-pyrolysis of C2H2NBr and C7H7Br. The intermediates and products are enriched in a cold trap and further analyzed by GC×GC-MS methods implemented in this work.

1. **Supplementary Tables**

**Table S1.** The Arrhenius parameters for the rate coefficients of dominant channels including isomerization, dehydrogenation and H-abstractions reactions in the ∙C7H7 + ∙C2H2N reaction at the pressure of 0.01-1.0 atm.

| NO. | Reactions | A | n | E /cal mol-1 |
| --- | --- | --- | --- | --- |
| 1 | C9H8N(a2) = C9H7N(a3) +H |  |  |  |
|  | plog 0.01 | 9.22E+09 | 2.71E-01 | 3.28E+04 |
|  | plog 0. 1 | 1.87E-02 | 4.12E+00 | 3.12E+04 |
|  | plog 1 | 4.54E-02 | 4.30E+00 | 3.53E+04 |
| 2 | C9H6N(a4) = C9H5N(p1)+H |  |  |  |
|  | plog 0.01 | 5.45E+06 | 1.20E+00 | 3.13E+04 |
|  | plog 0. 1 | 1.40E-02 | 4.13E+00 | 3.11E+04 |
|  | plog 1 | 4.34E-03 | 4.62E+00 | 3.52E+04 |
| 3 | C9H8N(a5) = C9H7N(a6) +H |  |  |  |
|  | plog 0.01 | 2.51E+00 | 3.13E+00 | 3.07E+04 |
|  | plog 0. 1 | 1.13E-04 | 4.72E+00 | 3.23E+04 |
|  | plog 1 | 6.82E+00 | 3.41E+00 | 3.62E+04 |
| 4 | C9H6N(a8) = C9H6N(a9) |  |  |  |
|  | plog 0.01 | 3.39E+20 | -3.48E+00 | 1.43E+04 |
|  | plog 0. 1 | 2.61E-03 | 3.92E+00 | 5.97E+03 |
|  | plog 1 | 3.71E+19 | -2.63E+00 | 1.59E+04 |
| 5 | C9H6N(a7) = C9H5N(p1)+H |  |  |  |
|  | plog 0.01 | 6.22E+15 | -1.53E+00 | 3.35E+04 |
|  | plog 0. 1 | 8.62E+10 | 3.36E-01 | 3.55E+04 |
|  | plog 1 | 1.97E+01 | 3.52E+00 | 3.45E+04 |
| 6 | C9H9N(a1) +H=C9H8N(a2) +H2 | 1.03E+06 | 2.27E+00 | 5.33E+03 |
| 7 | C9H9N(a1) +H=C9H8N(a5) +H2 | 2.27E+06 | 2.13E+00 | 6.36E+03 |
| 8 | C9H7N(a3) +H=C9H6N(a4) +H2 | 7.00E+06 | 1.92E+00 | 1.73E+04 |
| 9 | C9H7N(a6) +H=C9H6N(a7) +H2 | 4.64E+06 | 1.98E+00 | 1.56E+04 |
| 10 | C9H7N(a6) +H=C9H6N(a8) +H2 | 4.50E+06 | 1.92E+00 | 1.65E+04 |

**Table S2.** Precursors, reaction conditions, and the characterization methods for all experiments of this work.

| Precursors | Mole fraction | Radical | T1/K | T2/K | P1/Torr | Method |
| --- | --- | --- | --- | --- | --- | --- |
| **SiC microreactor experiments** | | | | | | |
| C7H7Br | 1.1% | **·**C7H7 |  | | | SVUV-PIMS; GC×GC-MS |
| C2H2NBr | 6.9% | **·**C2H2N | 298 | 1650 | 46 |
| T1 is the temperature of the liquid reactant tank, and T2 is the temperature of the reactor.  The mole fractions of the precursors are estimated using their saturated vapor pressure. | | | | | | |

**Table S3**. The *m/z* of the assigned products in the pyrolysis of C2H2BrN + C7H7Br in a SiC

microreactor at 1650 K.

| Chemical formula | Theoretical *m/z* | Measured *m/z* (SiC) |
| --- | --- | --- |
| C2H2N | 40.019 | 40.022 |
| C2H3N | 41.027 | 41.024 |
| C3H3N | 53.027 | 53.031 |
| C6H6 | 78.047 | 78.028 |
| C7H5 | 89.039 | 89.045 |
| C7H7 | 91.055 | 91.061 |
| C2H279BrN | 118.937 | 118.943 |
| C2H281BrN | 120.935 | 120.939 |
| C9H5N | 127.042 | 127.052 |
| C9H6N | 128.050 | 128.059 |
| C9H7N | 129.058 | 129.063 |
| C9H8N | 130.066 | 130.074 |
| C9H9N | 131.073 | 131.081 |
| Br2 | 159.835 | 159.836 |
| C7H779Br | 169.973 | 169.979 |
| C7H781Br | 171.971 | 171.978 |
| C3H3Br2 | 198.858 | 198.856 |

**Table S4.** The measured retention times (RT1, RT2) of C7H7Br, C9H9N, C9H7N, and C9H5N species in the enriched products in the pyrolysis of C2H2BrN + C7H7Br in a SiC microreactor at 1650 K. The reference retention time (RT4) of the standard sample are listed.

| **ID** | **RT1** | **RT2** | **Assignment** | **Formula** |
| --- | --- | --- | --- | --- |
| 1 | 32.26 | 2.40 | Benzyl bromide precusor | C7H7Br |
| 2 | 39.86 | 2.78 | / | C9H7N |
| 3 | 40.16 | 2.68 | C9H7N |
| 4 (p1) | 40.36 | 2.17 | C9H5N |
| 5 | 45.16 | 3.36 | C9H9N |
| 6 (p2) | 45.26 | 3.25 | Quinoline | C9H7N |
| 7 (a6) | 45.36 | 3.20 | Cis-cinnamonitrile | C9H7N |
| 8 (a1) | 45.76 | 3.16 | Phenylpropanenitrile | C9H9N |
| 9 (a3) | 50.36 | 3.14 | Trans-cinnamonitrile | C9H7N |

1. **Coordinates and Frequencies**

The Cartesian coordinates and frequencies of the structures shown in Figure 5 are provided

Table S3.

Table S5. The Cartesian coordinates and frequencies of the calculated structures

| **·**C2H2N +**·**C7H7 | | | | | | |
| --- | --- | --- | --- | --- | --- | --- |
| a1 | X (Å) | Y (Å) | Z (Å) | Frequencies (cm-1) | | |
| C | -2.449434 | 1.205641 | -0.135658 | 42.6714 | 63.6581 | 86.9782 |
| C | -1.099149 | 1.203663 | 0.211564 | 178.302 | 284.124 | 337.0615 |
| C | -0.409363 | 0.000416 | 0.388776 | 393.273 | 414.0849 | 468.3082 |
| C | -1.098556 | -1.203255 | 0.212188 | 536.9317 | 604.8155 | 627.9919 |
| C | -2.448845 | -1.206077 | -0.135034 | 718.6791 | 756.1561 | 773.716 |
| C | -3.127507 | -0.000432 | -0.310451 | 836.6709 | 865.9093 | 930.2139 |
| H | -2.974878 | 2.150839 | -0.264857 | 971.8002 | 999.3886 | 1007.4507 |
| H | -0.574866 | 2.149652 | 0.353805 | 1013.3513 | 1019.8394 | 1050.1731 |
| H | -0.573834 | -2.148926 | 0.354932 | 1060.6721 | 1108.0459 | 1164.3962 |
| H | -2.973815 | -2.151608 | -0.263727 | 1176.6605 | 1194.2343 | 1233.68 |
| H | -4.182958 | -0.000749 | -0.578174 | 1271.5372 | 1288.1497 | 1340.5609 |
| C | 1.063681 | 0.00087 | 0.713308 | 1347.1786 | 1365.9801 | 1446.3757 |
| H | 1.324367 | -0.883374 | 1.306654 | 1477.8812 | 1485.331 | 1533.0854 |
| H | 1.324278 | 0.886614 | 1.304442 | 1663.423 | 1684.793 | 2411.7565 |
| C | 3.340333 | -0.000232 | -0.295061 | 3085.8574 | 3095.965 | 3130.8779 |
| N | 4.46725 | 0.000167 | -0.037832 | 3151.4963 | 3190.8962 | 3190.9776 |
| C | 1.901132 | -0.000701 | -0.579902 | 3210.3491 | 3218.5749 | 3231.5002 |
| H | 1.663526 | 0.883006 | -1.184437 |  |  |  |
| H | 1.663684 | -0.885973 | -1.182201 |  |  |  |
| a2 | X (Å) | Y (Å) | Z (Å) | Frequencies (cm-1) | | |
| C | -2.274713 | 1.294387 | 0.000054 | 42.0861 | 107.6651 | 126.2925 |
| C | -0.903332 | 1.080358 | -0.000047 | 216.3903 | 236.7454 | 371.2416 |
| C | -0.375358 | -0.236637 | -0.000105 | 380.4341 | 414.2597 | 483.6311 |
| C | -1.294589 | -1.318654 | -0.000051 | 512.7889 | 607.7708 | 612.5556 |
| C | -2.660781 | -1.093625 | 0.000047 | 621.4463 | 699.177 | 783.3819 |
| C | -3.162117 | 0.214169 | 0.000109 | 847.1307 | 860.4229 | 901.2862 |
| H | -2.660776 | 2.312679 | 0.000091 | 927.6048 | 967.3167 | 993.4178 |
| H | -0.231333 | 1.937593 | -0.000108 | 999.7805 | 1015.5991 | 1054.0208 |
| H | -0.906443 | -2.337062 | -0.000098 | 1087.4876 | 1128.0798 | 1161.8784 |
| H | -3.347763 | -1.93866 | 0.000075 | 1182.1705 | 1198.1311 | 1229.7833 |
| H | -4.236513 | 0.388732 | 0.000214 | 1280.7999 | 1332.3538 | 1347.8494 |
| C | 1.018541 | -0.494476 | -0.000123 | 1428.0983 | 1437.7728 | 1487.7062 |
| H | 1.371079 | -1.523208 | -0.000091 | 1509.8203 | 1622.2537 | 1634.3765 |
| C | 3.410461 | 0.095702 | 0.000055 | 2420.2776 | 3033.2772 | 3067.887 |
| N | 4.487491 | -0.321966 | 0.000191 | 3200.801 | 3205.1786 | 3214.5534 |
| C | 2.036098 | 0.608542 | -0.000117 | 3221.3248 | 3230.6201 | 3232.2046 |
| H | 1.916921 | 1.257607 | 0.881672 |  |  |  |
| H | 1.917121 | 1.257481 | -0.882029 |  |  |  |
| a3 | X (Å) | Y (Å) | Z (Å) | Frequencies (cm-1) | | |
| C | 2.284007 | 1.29223 | 0.00007 | 64.0374 | 93.8219 | 113.9767 |
| C | 0.907083 | 1.106212 | -0.000009 | 244.2746 | 257.7026 | 384.1037 |
| C | 0.363648 | -0.18847 | -0.000061 | 414.6108 | 453.5172 | 508.7683 |
| C | 1.236537 | -1.28506 | -0.000031 | 561.8595 | 626.201 | 633.3435 |
| C | 2.617216 | -1.09926 | 0.000048 | 713.7367 | 781.4573 | 863.5975 |
| C | 3.144134 | 0.190507 | 0.000099 | 866.0542 | 880.7341 | 955.5481 |
| H | 2.692993 | 2.301218 | 0.00011 | 1008.5577 | 1011.3949 | 1012.9613 |
| H | 0.253794 | 1.977149 | -0.00003 | 1031.3919 | 1034.0734 | 1065.7506 |
| H | 0.824167 | -2.29407 | -0.000071 | 1113.7925 | 1169.8943 | 1200.2716 |
| H | 3.280949 | -1.96225 | 0.000071 | 1234.5336 | 1295.283 | 1323.6165 |
| H | 4.222551 | 0.34098 | 0.000161 | 1354.2618 | 1356.3913 | 1483.5649 |
| C | -1.08126 | -0.4468 | -0.000144 | 1537.0646 | 1656.6049 | 1681.6581 |
| H | -1.3756 | -1.49791 | -0.000177 | 1721.8225 | 2390.8938 | 3195.8388 |
| C | -3.43769 | 0.101413 | -0.000276 | 3200.8667 | 3208.274 | 3216.4545 |
| N | -4.55961 | -0.18744 | 0.000431 | 3223.4654 | 3229.4476 | 3233.5091 |
| C | -2.05506 | 0.479031 | -0.000186 |  |  |  |
| H | -1.85331 | 1.548144 | -0.000158 |  | | |
| a4 | X (Å) | Y (Å) | Z (Å) | Frequencies (cm-1) | | |
| C | -2.427089 | 1.205737 | -0.098265 | 27.9767 | 77.5217 | 137.1251 |
| C | -1.053283 | 1.218191 | 0.011897 | 179.9274 | 261.6327 | 399.5947 |
| C | -0.335335 | -0.000029 | 0.078441 | 402.5554 | 420.197 | 484.2673 |
| C | -1.053303 | -1.218206 | 0.011933 | 531.8542 | 611.8477 | 627.1067 |
| C | -2.427132 | -1.205712 | -0.098241 | 694.85 | 772.7535 | 792.9121 |
| C | -3.122459 | 0.00001 | -0.154168 | 824.3545 | 854.7195 | 932.7153 |
| H | -2.966558 | 2.14271 | -0.142503 | 961.9991 | 996.25 | 1003.5479 |
| H | -0.508307 | 2.151599 | 0.050678 | 1014.5487 | 1052.9776 | 1114.4094 |
| H | -0.508378 | -2.151641 | 0.050763 | 1138.1393 | 1174.74 | 1210.1004 |
| H | -2.966619 | -2.142676 | -0.14246 | 1298.0787 | 1318.729 | 1349.8576 |
| H | -4.200348 | 0.000021 | -0.243381 | 1477.014 | 1499.9517 | 1606.9544 |
| C | 1.047508 | -0.00004 | 0.15671 | 1622.8398 | 1849.8916 | 2406.5896 |
| C | 3.442308 | 0.000008 | -0.06852 | 3108.7709 | 3208.4346 | 3214.7827 |
| N | 4.424479 | -0.000043 | -0.661747 | 3225.174 | 3230.1733 | 3235.6353 |
| C | 2.231657 | 0.000055 | 0.705463 |  |  |  |
| H | 2.361626 | 0.000209 | 1.787633 |  |  |  |
| a5 | X (Å) | Y (Å) | Z (Å) | Frequencies (cm-1) | | |
| C | -1.99692 | 0.035365 | 1.191362 | 20.1265 | 31.1006 | 70.3862 |
| C | -0.77466 | 0.699167 | 1.091402 | 180.8084 | 314.0512 | 332.7466 |
| C | -0.10027 | 0.762871 | -0.129512 | 408.1285 | 412.7358 | 499.4373 |
| C | -0.66466 | 0.148822 | -1.250896 | 519.8826 | 559.4159 | 627.857 |
| C | -1.88563 | -0.515249 | -1.154517 | 669.784 | 715.8368 | 771.6063 |
| C | -2.55497 | -0.572383 | 0.06797 | 815.706 | 861.5146 | 882.3419 |
| H | -2.51349 | -0.007858 | 2.149045 | 924.7276 | 948.4634 | 997.006 |
| H | -0.33887 | 1.169361 | 1.973386 | 1012.7971 | 1018.7508 | 1060.4708 |
| H | -0.14049 | 0.186573 | -2.206557 | 1104.0738 | 1120.4534 | 1159.0896 |
| H | -2.31559 | -0.990405 | -2.034972 | 1170.0159 | 1194.5635 | 1231.9459 |
| H | -3.50888 | -1.091807 | 0.144565 | 1331.6342 | 1337.7539 | 1347.0652 |
| C | 1.245839 | 1.437211 | -0.229515 | 1389.7027 | 1449.3433 | 1486.3064 |
| H | 1.339671 | 2.213794 | 0.545991 | 1534.706 | 1666.1016 | 1686.5586 |
| H | 1.338282 | 1.963096 | -1.192599 | 2216.3371 | 3041.3172 | 3074.5748 |
| C | 2.263456 | -0.868011 | 0.17725 | 3194.2032 | 3195.5118 | 3211.0548 |
| N | 2.155227 | -2.008616 | 0.404563 | 3220.8895 | 3227.832 | 3231.8469 |
| C | 2.406586 | 0.495738 | -0.097795 |  |  |  |
| H | 3.420192 | 0.876366 | -0.2053 |  |  |  |
| a6 | X (Å) | Y (Å) | Z (Å) | Frequencies (cm-1) |  |  |
| C | -1.479089 | -1.526002 | -0.000003 | 29.4055 | 131.5356 | 160.5253 |
| C | -0.266691 | -0.843411 | -0.000003 | 232.6055 | 323.412 | 400.49 |
| C | -0.248103 | 0.562119 | 0 | 415.8548 | 452.626 | 517.8859 |
| C | -1.472047 | 1.25106 | 0.000002 | 612.7398 | 623.5518 | 712.7924 |
| C | -2.682811 | 0.565649 | 0.000003 | 735.9202 | 755.6959 | 804.8027 |
| C | -2.68831 | -0.828426 | 0 | 818.9143 | 867.7767 | 959.0499 |
| H | -1.479757 | -2.614623 | -0.000005 | 976.1627 | 1009.8866 | 1010.8468 |
| H | 0.658601 | -1.412499 | -0.000005 | 1026.5889 | 1032.4512 | 1063.8713 |
| H | -1.468438 | 2.341189 | 0.000004 | 1121.0803 | 1169.1206 | 1207.5123 |
| H | -3.620728 | 1.118457 | 0.000004 | 1211.0704 | 1256.4213 | 1346.9746 |
| H | -3.632123 | -1.371716 | 0 | 1354.8235 | 1425.8123 | 1482.0297 |
| C | 0.974364 | 1.374183 | -0.000001 | 1534.7568 | 1651.3083 | 1677.4765 |
| H | 0.793971 | 2.450631 | 0.000001 | 1713.0161 | 2385.169 | 3185.0878 |
| C | 2.777051 | -0.326334 | -0.000006 | 3202.0119 | 3211.9938 | 3223.3394 |
| N | 3.22759 | -1.394032 | 0.000009 | 3226.5975 | 3232.4812 | 3257.2398 |
| C | 2.271833 | 1.014468 | -0.000003 |  |  |  |
| H | 3.038166 | 1.786948 | -0.000003 |  |  |  |
| a7 | X (Å) | Y (Å) | Z (Å) | Frequencies (cm-1) |  |  |
| C | 1.504811 | -1.542855 | 0.000001 | 39.5713 | 58.6883 | 180.4289 |
| C | 0.311459 | -0.843965 | 0.000005 | 239.4408 | 289.3434 | 390.6508 |
| C | 0.316788 | 0.55263 | 0.000001 | 413.0031 | 473.1056 | 496.2272 |
| C | 1.535886 | 1.229196 | -0.000007 | 574.8996 | 616.9618 | 630.4431 |
| C | 2.730706 | 0.526172 | -0.000011 | 711.9229 | 764.078 | 807.8965 |
| C | 2.717079 | -0.860807 | -0.000007 | 866.5345 | 877.0544 | 917.2407 |
| H | 1.49253 | -2.624791 | 0.000004 | 960.8295 | 998.7448 | 1021.8519 |
| H | -0.629309 | -1.380323 | 0.000012 | 1024.6048 | 1064.6005 | 1120.3422 |
| H | 1.543111 | 2.312626 | -0.000009 | 1180.215 | 1209.1163 | 1229.9638 |
| H | 3.6711 | 1.061264 | -0.000018 | 1288.836 | 1342.0542 | 1369.9403 |
| H | 3.648127 | -1.412199 | -0.000011 | 1499.5366 | 1541.6346 | 1654.2598 |
| C | -0.927007 | 1.337831 | 0.000009 | 1672.4724 | 1792.1919 | 2201.9019 |
| H | -0.80164 | 2.419428 | 0.000016 | 3135.321 | 3200.935 | 3208.3155 |
| C | -3.036016 | -0.165536 | 0.000018 | 3216.442 | 3224.9542 | 3233.7474 |
| N | -3.850324 | -0.993771 | -0.00002 |  |  |  |
| C | -2.148981 | 0.864065 | 0.000016 |  |  |  |
| a8 | X (Å) | Y (Å) | Z (Å) | Frequencies (cm-1) |  |  |
| C | 1.340711 | 1.544969 | -0.000009 | 54.8419 | 103.3999 | 160.3952 |
| C | 0.21655 | 0.756536 | -0.000008 | 215.6246 | 320.4392 | 392.6429 |
| C | 0.201604 | -0.63133 | 0 | 419.4678 | 467.182 | 513.5213 |
| C | 1.461289 | -1.260451 | 0.000008 | 607.5062 | 618.0569 | 725.8831 |
| C | 2.633289 | -0.507934 | 0.000007 | 728.0312 | 753.5367 | 803.7509 |
| C | 2.579631 | 0.887492 | -0.000002 | 819.763 | 881.2368 | 970.378 |
| H | 1.277037 | 2.631889 | -0.000016 | 976.9146 | 988.2614 | 1012.2114 |
| H | 1.510757 | -2.350126 | 0.000014 | 1020.5374 | 1052.6128 | 1131.34 |
| H | 3.597836 | -1.012263 | 0.000013 | 1161.049 | 1203.6499 | 1235.6243 |
| H | 3.50057 | 1.469669 | -0.000002 | 1265.3928 | 1339.7513 | 1417.5199 |
| C | -1.022636 | -1.432239 | 0.000001 | 1457.2538 | 1491.3831 | 1608.9144 |
| H | -0.883057 | -2.513947 | 0.000011 | 1671.99 | 1712.4816 | 2384.2072 |
| C | -2.638617 | 0.41435 | -0.000025 | 3195.4732 | 3201.6896 | 3208.6276 |
| N | -2.968764 | 1.525265 | 0.000031 | 3221.0471 | 3232.5194 | 3235.1325 |
| C | -2.288101 | -0.976367 | -0.00001 |  |  |  |
| H | -3.124113 | -1.672231 | -0.000009 |  |  |  |
| a9 | X (Å) | Y (Å) | Z (Å) | Frequencies (cm-1) |  |  |
| C | -1.224791 | -1.372623 | -0.000007 | 171.8537 | 195.4777 | 385.4147 |
| C | 0.027732 | -0.729792 | -0.000005 | 397.4127 | 486.1225 | 496.5379 |
| C | 0.095304 | 0.684 | 0.000003 | 516.4115 | 534.1747 | 606.0674 |
| C | -1.107596 | 1.424037 | 0.000007 | 645.6934 | 765.3266 | 778.8 |
| C | -2.315863 | 0.781808 | 0.000003 | 803.7883 | 814.5897 | 841.2019 |
| C | -2.373119 | -0.627048 | -0.000004 | 907.8175 | 922.488 | 990.1927 |
| H | -1.243261 | -2.454198 | -0.000012 | 1012.1746 | 1021.2751 | 1048.3243 |
| H | -1.057079 | 2.506329 | 0.000013 | 1067.3405 | 1138.0387 | 1162.9928 |
| H | -3.234069 | 1.354088 | 0.000006 | 1171.1029 | 1230.967 | 1273.4687 |
| H | -3.33644 | -1.120344 | -0.000006 | 1308.3279 | 1385.4294 | 1421.8872 |
| C | 1.377993 | 1.295427 | 0.000012 | 1444.0967 | 1516.336 | 1556.5044 |
| H | 1.443306 | 2.378058 | 0.00002 | 1636.3271 | 1692.509 | 1723.9979 |
| C | 2.288743 | -0.867966 | -0.000007 | 3190.9313 | 3199.8503 | 3211.7501 |
| N | 1.18368 | -1.472536 | -0.000007 | 3226.3832 | 3234.3019 | 3241.6132 |
| C | 2.505407 | 0.527659 | 0.000003 |  |  |  |
| H | 3.498921 | 0.950811 | -0.000001 |  |  |  |
| a10 | X (Å) | Y (Å) | Z (Å) | Frequencies (cm-1) |  |  |
| C | 2.182167 | 0.905568 | -0.232809 | 107.5874 | 143.3344 | 314.7377 |
| C | 0.927845 | 1.461494 | 0.089226 | 346.391 | 384.7091 | 400.2883 |
| C | -0.138584 | 0.679957 | 0.414568 | 487.3822 | 523.7493 | 529.3993 |
| C | 0.050677 | -0.809007 | 0.581769 | 582.2242 | 640.4701 | 665.7193 |
| C | 1.317839 | -1.331875 | 0.015571 | 700.6638 | 719.1491 | 779.6401 |
| C | 2.331707 | -0.499021 | -0.322257 | 793.3852 | 854.355 | 893.4341 |
| H | 3.007961 | 1.553674 | -0.489833 | 930.5734 | 963.6688 | 975.9139 |
| H | 0.795772 | 2.535564 | 0.021802 | 990.9724 | 1017.2395 | 1058.9336 |
| H | 0.033352 | -1.038201 | 1.659714 | 1116.4144 | 1130.3838 | 1158.2936 |
| H | 1.418623 | -2.407174 | -0.052017 | 1168.8861 | 1189.9578 | 1230.374 |
| H | 3.267244 | -0.90929 | -0.680308 | 1255.6909 | 1294.0639 | 1337.051 |
| C | -1.565695 | 1.190127 | 0.445173 | 1383.3876 | 1401.6087 | 1434.1258 |
| H | -1.602695 | 2.267672 | 0.295897 | 1471.7265 | 1561.9929 | 1620.9032 |
| H | -2.06517 | 0.948317 | 1.386357 | 1985.7562 | 2962.8827 | 3067.8858 |
| C | -1.880983 | -0.814925 | -0.510989 | 3147.2204 | 3191.0829 | 3205.5035 |
| N | -1.216195 | -1.592017 | 0.158707 | 3223.1022 | 3233.1827 | 3287.0423 |
| C | -2.214769 | 0.436079 | -0.739135 |  |  |  |
| H | -2.402943 | 0.883179 | -1.699257 |  |  |  |
| a11 | X (Å) | Y (Å) | Z (Å) | Frequencies (cm-1) |  |  |
| C | 2.379085 | 0.773546 | -0.096296 | 95.3456 | 171.9325 | 260.8458 |
| C | 1.147669 | 1.409999 | -0.014731 | 367.6985 | 379.2098 | 431.7612 |
| C | -0.03329 | 0.687915 | 0.08963 | 467.1788 | 509.0825 | 533.4571 |
| C | 0.044913 | -0.708627 | 0.076118 | 559.3761 | 612.9905 | 689.4543 |
| C | 1.271291 | -1.356175 | -0.009165 | 751.5386 | 759.8176 | 783.9664 |
| C | 2.438486 | -0.613144 | -0.083264 | 807.4063 | 875.862 | 912.5615 |
| H | 3.286954 | 1.357325 | -0.16729 | 941.9485 | 968.0464 | 994.3081 |
| H | 1.099722 | 2.492928 | -0.015186 | 1003.1523 | 1072.9875 | 1117.3009 |
| H | -1.155282 | -2.351903 | 0.564381 | 1141.1979 | 1177.0249 | 1202.2886 |
| H | 1.302841 | -2.438991 | -0.027547 | 1210.8132 | 1266.6604 | 1274.8257 |
| H | 3.39297 | -1.118999 | -0.145871 | 1291.2997 | 1325.8132 | 1344.8256 |
| C | -1.379934 | 1.364616 | 0.262952 | 1450.9121 | 1475.4217 | 1512.8224 |
| H | -1.377164 | 2.325795 | -0.253856 | 1539.4654 | 1652.2242 | 1675.1781 |
| H | -1.541226 | 1.585916 | 1.324491 | 1693.0523 | 3025.374 | 3099.45 |
| C | -2.314923 | -0.824576 | -0.18131 | 3193.5833 | 3200.2447 | 3215.8559 |
| N | -1.158964 | -1.437053 | 0.146272 | 3230.1285 | 3232.6111 | 3652.4867 |
| C | -2.480618 | 0.482098 | -0.29441 |  |  |  |
| H | -3.332133 | 0.913382 | -0.80017 |  |  |  |
| a12 | X (Å) | Y (Å) | Z (Å) | Frequencies (cm-1) |  |  |
| C | 2.42988 | 0.701033 | -0.000417 | 108.3909 | 169.4524 | 263.6419 |
| C | 1.224163 | 1.38335 | -0.000327 | 376.7482 | 440.9987 | 470.1946 |
| C | 0.01547 | 0.699433 | -0.000025 | 501.0144 | 517.5667 | 567.0662 |
| C | 0.020743 | -0.70901 | 0.000187 | 603.2115 | 708.0619 | 743.1162 |
| C | 1.250556 | -1.388442 | 0.000385 | 760.775 | 792.7597 | 819.9121 |
| C | 2.440348 | -0.693709 | 0.000022 | 884.1489 | 928.0656 | 946.0628 |
| H | 3.361754 | 1.251134 | -0.000713 | 968.4651 | 980.6402 | 998.6415 |
| H | 1.217068 | 2.467901 | -0.00048 | 1010.1316 | 1067.1797 | 1122.8995 |
| H | -3.174073 | -1.479743 | -0.000863 | 1146.8065 | 1158.6427 | 1188.4085 |
| H | 1.222627 | -2.470179 | 0.000782 | 1190.6715 | 1221.2273 | 1232.7693 |
| H | 3.381294 | -1.228068 | -0.000037 | 1285.1743 | 1323.691 | 1375.8576 |
| C | -1.292164 | 1.436371 | 0.000809 | 1430.4794 | 1447.0738 | 1477.8321 |
| H | -1.343673 | 2.109539 | -0.866122 | 1517.3975 | 1543.1134 | 1629.3905 |
| H | -1.34394 | 2.106926 | 0.86981 | 1668.7796 | 3000.0936 | 3012.8725 |
| C | -2.296599 | -0.841091 | -0.00042 | 3175.9996 | 3187.2995 | 3210.768 |
| N | -1.123619 | -1.478482 | 0.000078 | 3213.9377 | 3222.9342 | 3232.5892 |
| C | -2.459079 | 0.520416 | -0.0006 |  |  |  |
| H | -3.455636 | 0.941757 | -0.000605 |  |  |  |
| p1 | X (Å) | Y (Å) | Z (Å) | Frequencies (cm-1) |  |  |
| C | 2.47434 | 1.209627 | -0.000066 | 70.4632 | 71.4072 | 153.071 |
| C | 1.083464 | 1.215865 | 0.000043 | 207.9165 | 344.608 | 367.9725 |
| C | 0.382794 | 0.000073 | 0.000097 | 407.8735 | 500.4816 | 508.0706 |
| C | 1.083233 | -1.215812 | 0.00004 | 541.642 | 547.0064 | 628.1059 |
| C | 2.474109 | -1.209815 | -0.000063 | 697.5702 | 709.5523 | 785.4573 |
| C | 3.170181 | -0.000157 | -0.000119 | 863.0588 | 951.0036 | 977.5241 |
| H | 3.018113 | 2.152664 | -0.00011 | 1002.3023 | 1014.415 | 1024.0266 |
| H | 0.530013 | 2.152783 | 0.00009 | 1059.0588 | 1106.2512 | 1170.5045 |
| H | 0.52961 | -2.152631 | 0.000085 | 1192.563 | 1306.5022 | 1314.688 |
| H | 3.017703 | -2.152951 | -0.000104 | 1345.2689 | 1475.4279 | 1527.9789 |
| H | 4.259088 | -0.000256 | -0.000207 | 1645.3225 | 1677.2964 | 2309.6218 |
| C | -1.048257 | 0.00033 | 0.00021 | 2453.5504 | 3212.2842 | 3220.0866 |
| C | -3.644713 | -0.000018 | -0.000123 | 3227.0556 | 3233.5047 | 3238.5048 |
| N | -4.804487 | -0.000187 | -0.000212 |  |  |  |
| C | -2.262337 | 0.000191 | 0.00027 |  |  |  |
| P2 | X (Å) | Y (Å) | Z (Å) | Frequencies (cm-1) |  |  |
| C | -1.205234 | -1.404142 | 0 | 178.2613 | 186.4529 | 386.575 |
| C | 0.029577 | -0.701061 | 0.000001 | 407.4503 | 486.8818 | 498.7292 |
| C | 0.015413 | 0.721432 | 0 | 526.5482 | 528.5731 | 619.1307 |
| C | -1.229436 | 1.406605 | 0 | 655.7709 | 754.2274 | 785.0894 |
| C | -2.408031 | 0.70254 | 0 | 819.6268 | 825.0309 | 834.4581 |
| C | -2.394021 | -0.716957 | 0 | 907.9479 | 947.6185 | 987.2507 |
| H | -1.168286 | -2.492007 | 0 | 992.292 | 1016.5302 | 1022.9664 |
| H | -1.230983 | 2.496643 | -0.000001 | 1043.0483 | 1059.5278 | 1137.1453 |
| H | -3.360162 | 1.230856 | -0.000001 | 1156.3919 | 1158.4375 | 1231.7972 |
| H | -3.337151 | -1.261545 | 0 | 1263.9482 | 1275.677 | 1372.7612 |
| C | 1.2648 | 1.393446 | 0.000001 | 1409.5744 | 1431.2048 | 1472.4816 |
| H | 1.28775 | 2.483646 | 0.000002 | 1507.9878 | 1559.5036 | 1654.7347 |
| C | 2.319732 | -0.763574 | -0.000001 | 1681.7703 | 1705.0748 | 3177.8953 |
| N | 1.187148 | -1.425281 | 0 | 3200.8168 | 3201.8795 | 3211.3632 |
| C | 2.41852 | 0.654504 | 0 | 3225.1206 | 3231.6561 | 3233.9201 |
| H | 3.398942 | 1.126723 | 0 |  |  |  |
| H | 3.231943 | -1.364103 | 0 |  |  |  |
|  |  |  |  |  |  |  |
|  |  |  |  |  |  |  |
|  |  |  |  |  |  |  |
|  |  |  |  |  |  |  |
